# Supplementary material for: Interfacial electrostatics guiding the crystallization of CaCO3 underneath monolayers of calixarenes and resorcarenesElectronic supplementary information (ESI) available: representative optical and scanning electron micrographs of CaCO3 crystals grown underneath a monolayer of 1 at low surface pressure; additional crystallographic data including numbering schemes, tables and refinement details. See http://www.rsc.org/suppdata/jm/b4/b403132f/
Source: Royal Society of Chemistry journal article supplement (doi:10.1039/b403132f), 2004-01-01
Supplement: b403132f-2.pdf [file b403132f-2.pdf]

**Interfacial Electrostatics Guiding the Crystallization of CaCO<sub>3</sub> Underneath Monolayers  
of Calixarenes and Resorcarenes**

Dirk Volkmer,\* Marc Fricke, Ceno Agena, and Jochen Mattay

\* Author for correspondence

PD Dr. D. Volkmer  
Faculty of Chemistry (AC1)  
University of Bielefeld  
D-33501 Bielefeld (Germany)  
P.O. Box 100 131  
Telephone: (+49) 521-106 6142  
Fax: (+49) 521-106 6003  
E-mail: [dirk.volkmer@uni-bielefeld.de](mailto:dirk.volkmer@uni-bielefeld.de)

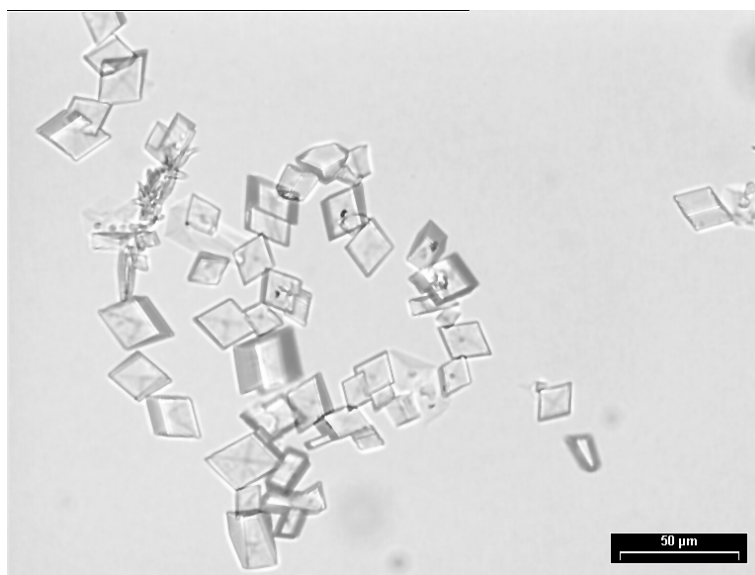

Brightfield optical micrograph of CaCO<sub>3</sub> crystals grown under a monolayer of **1** after 2h. ( $\pi = 2$  mN/m, CaCl<sub>2</sub>/NaHCO<sub>3</sub> ( $c = 9/18$  mM)). (The viewing direction is parallel to the monolayer surface normal, crystals are observed from below the aqueous subphase.)

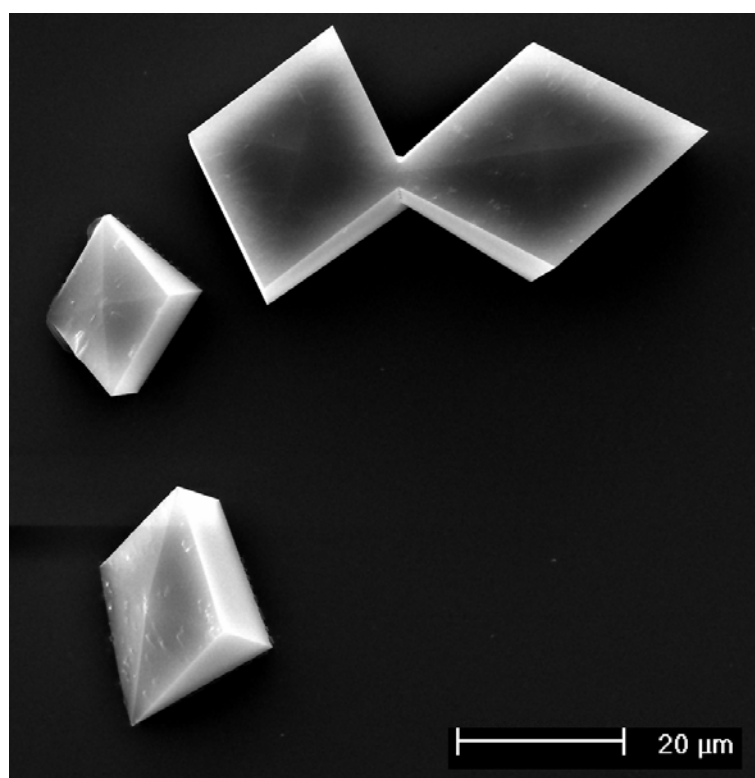

Scanning electron micrographs (crystals collected after 4 h) of CaCO<sub>3</sub> crystals grown under a monolayer of **1**. ( $\pi = 2$  mN/m, CaCl<sub>2</sub>/NaHCO<sub>3</sub> ( $c = 9/18$  mM)).
